# Supplementary material for: Guidelines for the management of hereditary colorectal cancer from the British Society of Gastroenterology (BSG)/Association of Coloproctology of Great Britain and Ireland (ACPGBI)/United Kingdom Cancer Genetics Group (UKCGG)
Source: PubMed Central journal article supplement — Gut. 2019 Nov 28;69(3):411–44. doi: 10.1136/gutjnl-2019-319915 (PMC7034349; doi:10.1136/gutjnl-2019-319915), 2019-11-28

**Supplement 1: Evidence GRADE Tables****GRADE Table 1: Studies of FHCC**

| Author, year      | Country | Study population                                                                       | Design                                                                 | Findings                                                                                                                                                                                                                                  | Comments                                           |
|-------------------|---------|----------------------------------------------------------------------------------------|------------------------------------------------------------------------|-------------------------------------------------------------------------------------------------------------------------------------------------------------------------------------------------------------------------------------------|----------------------------------------------------|
| Jacobs (2018)[36] | USA     | Stratified risk by age, gene                                                           | Prospective study of average risk patients on a surveillance programme | FH was significantly associated with metachronous adenomas (OR = 1.14; 95% CI = 1.01–1.29), however larger studies are needed to confirm possible but statistically non-significant findings related to metachronous AAs 1.15 (0.96–1.37) | Not powered to detect differences in AA prevalence |
| Plath (2017)[37]  | Germany | 191 people with a FDR with CRC.<br>Not stratified by degree of FH.<br>Aged 40-54 years | A cross-sectional study in general practice.                           | 86 (45%) underwent a colonoscopy during study period. No CRC was found, but 16.3% had any adenoma, and 7.0% had AA. The utilization of colonoscopies among participants increased up to 82% after counselling by general practitioners.   |                                                    |

|                        |         |                                                                                                                                |                                                                                                                                                                                                                                                                                               |                                                                                                                                                                                                                                                                                                                                                                                                                                                                                                                                                                                                                         |                                                       |
|------------------------|---------|--------------------------------------------------------------------------------------------------------------------------------|-----------------------------------------------------------------------------------------------------------------------------------------------------------------------------------------------------------------------------------------------------------------------------------------------|-------------------------------------------------------------------------------------------------------------------------------------------------------------------------------------------------------------------------------------------------------------------------------------------------------------------------------------------------------------------------------------------------------------------------------------------------------------------------------------------------------------------------------------------------------------------------------------------------------------------------|-------------------------------------------------------|
| Quintero<br>(2016)[38] | Spain   | 214 FDR aged 25-75 years, of people with CRC.<br>FHCC stratified by age (1x FDR above or below 60 years), and 2x FDRs any age. | Cross-sectional analysis included data from 8,498 individuals undergoing their first lifetime screening colonoscopy between 2006 and 2012 at six Spanish tertiary hospitals, 3,015 were defined as asymptomatic FDR of patients with CRC and 3,038 as asymptomatic with average-risk for CRC. | Compared to an average-risk group, advanced neoplasia were more prevalent in individuals with 2x FDR with CRC (odds ratio [OR] 1.90; 95% confidence interval [CI] 1.36–2.66, $p < 0.001$ ), but not in those with 1x FDR with CRC diagnosed at $\geq 60$ y (OR 1.03; 95% CI 0.83–1.27, $p = 0.77$ ) and $< 60$ y (OR 1.19; 95% CI 0.90–1.58, $p = 0.20$ ). After the age of 50 y, men developed advanced neoplasia over two times more frequently than women and advanced neoplasia appeared at least ten y earlier. Fewer colonoscopies by 2-fold were required to detect one advanced neoplasia in men than in women. |                                                       |
| Weigl<br>(2016)[39]    | Germany | 4313 patients with a first diagnosis of CRC (cases) and 3,153 controls recruited from 2003 to 2014 were included. A            | Population based case-control study                                                                                                                                                                                                                                                           | A FHCC was associated with a 41% increase in risk of CRC (OR: 1.41, 95% CI 1.22-1.63) after adjustment for sex and age.<br>Participants with a history of colonoscopies had a lower CRC risk compared with persons                                                                                                                                                                                                                                                                                                                                                                                                      | Colonoscopy may mitigate CRC risk in people with a FH |

|                     |             |                                                                                                               |                                                                                                                                                                                                                                                                                 |                                                                                                                                                                                                       |                                                                                                                      |
|---------------------|-------------|---------------------------------------------------------------------------------------------------------------|---------------------------------------------------------------------------------------------------------------------------------------------------------------------------------------------------------------------------------------------------------------------------------|-------------------------------------------------------------------------------------------------------------------------------------------------------------------------------------------------------|----------------------------------------------------------------------------------------------------------------------|
|                     |             | total of 582 cases (13.5%) and 321 (10.2%) controls reported a history of CRC in a first-degree relative      |                                                                                                                                                                                                                                                                                 | without previous colonoscopies and without FH (OR: 0.25, 95% CI, 0.22–0.28 for persons without FH and OR 0.45, 95% CI, 0.36–0.56 for persons with FH).                                                |                                                                                                                      |
| Hennink (2015)[33]  | Netherlands | 508 people with 1x FDR CRC diagnosed age <50 years or two affected FDRs<br>Study Population: aged 45-65 years | RCT FACTS (Familial CRC Surveillance) study. Patients with 0-2 adenomas at baseline were randomly assigned to one of two groups: group A (colonoscopy at 6 years) or group B (colonoscopy at 3 and 6 years). The primary outcome measure was advanced adenomatous polyps (AAs). | Intention-to-treat analysis showed no significant difference in the proportion of patients with AAs at the first follow-up examination at 6 years in group A (6.9%) versus 3 years in group B (3.5%). | Only AAs at baseline was a significant predictor for the presence of AAs at first follow-up (OR 5.2 (1.6 to 16.87)). |
| Forsberg (2015)[32] | Sweden      | 1203 FHCC                                                                                                     | Observational longitudinal study.                                                                                                                                                                                                                                               | 8% incidence of AAs. The risk of future AAs was only associated with the prevalence of                                                                                                                | The risk of future advanced lesions was                                                                              |

|                     |        |                                                                                                                                                                                                                                         |                                                                                       |                                                                                                                                                                                                                                                                                                                                                                                                                                                                       |                                                                                                      |
|---------------------|--------|-----------------------------------------------------------------------------------------------------------------------------------------------------------------------------------------------------------------------------------------|---------------------------------------------------------------------------------------|-----------------------------------------------------------------------------------------------------------------------------------------------------------------------------------------------------------------------------------------------------------------------------------------------------------------------------------------------------------------------------------------------------------------------------------------------------------------------|------------------------------------------------------------------------------------------------------|
|                     |        | Stratified FDR any age at diagnosis of CRC, FDR <50 years, 2 FDRs any age, or only SDR and TDR                                                                                                                                          | 1203 index colonoscopies, and 594 surveillance procedures following index colonoscopy | advanced lesions at the screening colonoscopy on 1209 patients with a FHCC (multivariate analysis OR 5.22: 95% CI 2.3-9.94).                                                                                                                                                                                                                                                                                                                                          | only associated with the prevalence of advanced lesions at the screening colonoscopy                 |
| Forsberg (2015)[40] | Sweden | 1397 FHCC, plus 745 controls without a FH who took part in a population-based colonoscopy study. Stratified 1x FDR <50 years, or 2x FDRs/SDR/TDRs, or 3x FDRs/SDRs/TDRs all of whom underwent a single index screening colonoscopy only | Observational case-control study                                                      | In LS, 30% of the individuals had adenomas and 10% AAs. The corresponding figures for AAs in the other risk groups were 14–24% (High moderate) and 4–7% (Low moderate), compared with 10% and 3% in the control group. The relative risk of having adenomas and AAs was, compared to controls, significantly higher for all risk groups except the group with the lowest risk. Age was a strong predictor for adenomas and AAs in both risk individuals and controls. | Age was a strong predictor for adenomas and advanced adenomas in both risk individuals and controls. |

|                    |                           |                                                                          |                                                                                                                                                                                                                             |                                                                                                                                                                                                                                                                                                                                                               |                                                                                                                    |
|--------------------|---------------------------|--------------------------------------------------------------------------|-----------------------------------------------------------------------------------------------------------------------------------------------------------------------------------------------------------------------------|---------------------------------------------------------------------------------------------------------------------------------------------------------------------------------------------------------------------------------------------------------------------------------------------------------------------------------------------------------------|--------------------------------------------------------------------------------------------------------------------|
| Ng (2013)[41]      | Hong Kong                 | 374 siblings of patients with AAs (not CRC), with a mean age of 58 years | Blinded, cross-sectional case-control study                                                                                                                                                                                 | The prevalence of advanced neoplasms was 7.5% among siblings of patients 2.9% among controls.                                                                                                                                                                                                                                                                 | Controls were people whose relatives did not have adenomas thus may have been a truly low risk group.              |
| Meshner (2013)[26] | Multicentre International | 1585 people with a high familial risk of CRC                             | Data from six European centres. Families were classified as FCC type X if they fulfilled the original Amsterdam criteria (AC) and late onset (LOFCC) if they fulfilled the AC apart from not having a cancer aged under 50. | 1585 individuals (median age 47.3, 44% male) from 530 FCC families (349 FCC type X) underwent a total of 4,992 colonoscopies with 7,904 patient-years of follow-up. Both FCC type X and LOFCC have a high prevalence of CRCs and on follow-up develop high-risk adenomas (including multiple adenomas) from age 30-40 years, but infrequent interval cancers. | No difference between FCC-X and LOFCC cohorts. The prevalence of AAs was >11.5% in people from the age of 40 years |
| Morois (2014) [20] | France                    | Large cohort study                                                       | 92,078 women of the E3N prospective cohort, 692 CRCs were diagnosed after a                                                                                                                                                 | In women with no prior colonoscopy, those with FHCC had a 80% higher CRC risk than those without FHCC. In women with previous colonoscopy, CRC risk was similar                                                                                                                                                                                               | Colonoscopy may mitigate CRC risk in people with a FH                                                              |

|                   |                |                                                                                                                                               |                                                                                                                       |                                                                                                                                                                                                                                                                                                                              |                                                                                                                                                                                                                         |
|-------------------|----------------|-----------------------------------------------------------------------------------------------------------------------------------------------|-----------------------------------------------------------------------------------------------------------------------|------------------------------------------------------------------------------------------------------------------------------------------------------------------------------------------------------------------------------------------------------------------------------------------------------------------------------|-------------------------------------------------------------------------------------------------------------------------------------------------------------------------------------------------------------------------|
|                   |                |                                                                                                                                               | median follow-up of 15.4 years.                                                                                       | in women with and without FHCC (p for interaction = 0.04).                                                                                                                                                                                                                                                                   |                                                                                                                                                                                                                         |
| Newton (2013)[15] | United Kingdom | Patients who had at least one CRC were categorized as follows: moderate risk (n = 383), LS (n = 528) and average (population) risk (n = 409). | A retrospective longitudinal study of the Regional Familial CRC Registry                                              | The 1-KM (Kaplan-Meier estimate) in moderate-risk patients was 2.7%, 6.3% and 23.5% at 5, 10 and 20 years, respectively. In average (population)-risk patients, the 1-KM was 1.3%, 3.1% and 7.0% at 5, 10 and 20 years, and the cumulative incidence function was 0.3%, 0.6% and 2.4% at the same time points, respectively. | The authors conclusion was that this justifies proactive lifelong surveillance in those CRC with moderate familial risk of CRC. However it is not clear that colonoscopic surveillance effectively mitigates this risk. |
| Tsai (2012)[30]   | USA            | 4,967 patients were divided into 643 with and 4,324 without a FHCC aged 40-89 years. Stratified by 1x FDR, or                                 | A large, prospective study of an unselected population in San Diego, California to assess the impact of a FHCC on the | Of the 643 patients with a FH, 38 (5.9%) had advanced neoplasia, one of which was cancer. Of the 4,324 patients without a FH, 211 (4.9%) had advanced neoplasia including seven cancers. The relative risk for                                                                                                               |                                                                                                                                                                                                                         |

|                           |             |                                                                                            |                                                           |                                                                                                                      |                                                                           |
|---------------------------|-------------|--------------------------------------------------------------------------------------------|-----------------------------------------------------------|----------------------------------------------------------------------------------------------------------------------|---------------------------------------------------------------------------|
|                           |             | 1x FDR aged <60 years, or 2x FDRs                                                          | prevalence of advanced neoplasia on screening colonoscopy | finding advanced neoplasia in patients with a single affected FDR was 1.21 (95% CI, 0.87–1.69; P = 0.31).            |                                                                           |
| Wilschutt (2010)[19]      | na          | FHCC, not stratified                                                                       | Meta-analysis                                             | Adenoma prevalence was significantly higher in individuals with a FH than in those without (OR 1.7, 95% CI 1.4–3.5), |                                                                           |
| Puente (2011)[42]         | Spain       | 263 people with FH CRC aged 25-75 years. Not stratified by degree of FH                    | Observational Study                                       | AAs or cancer was identified in 21.3% of 263 patients with a FHCC                                                    | in this study they did not actively exclude LS was not actively excluded. |
| Armelao (2011)[43]        | Italy       |                                                                                            | Observational Study                                       | AA incidence of 11% in patients aged 45-75 years with an unselected FHCC.                                            |                                                                           |
| Meulen-de Jong (2011)[23] | Netherlands | 456 people with FHCC aged 45-65 years. Stratified by 1FDR age <50 years, or 2 FDRs any age | Observational Study                                       | Adenomas were detected in 85 (18.6%) and adenomas with advanced pathology in 37 subjects (8.1%)                      |                                                                           |
| Wark (2009)[25]           | USA         | 345 people. Stratified by 1 or 2 FDRs with                                                 | Health Professionals Follow-Up Study (HPFS):              | A FHCC was similarly associated with advanced and non-advanced adenomas                                              |                                                                           |

|                       |        |                                                                                                                                                                   |                                                                                                                                                                   |                                                                                                                                                                |  |
|-----------------------|--------|-------------------------------------------------------------------------------------------------------------------------------------------------------------------|-------------------------------------------------------------------------------------------------------------------------------------------------------------------|----------------------------------------------------------------------------------------------------------------------------------------------------------------|--|
|                       |        |                                                                                                                                                                   | an ongoing prospective study among 51,529 male US health professionals who responded to a mailed questionnaire in 1986 when they were between 40 and 75 years old | [multivariable odds ratio (OR) (95% confidence interval): advanced versus adenoma-free: 1.67 (1.47–1.91), non-advanced versus adenoma-free: 1.70 (1.49–1.94)], |  |
| Stormorken (2007)[44] | Norway | 343 people with 3 FDRs                                                                                                                                            | Observational Study.                                                                                                                                              | 8 of 343 (2.1%) had either AAs or cancer in 3 years of mean follow-up                                                                                          |  |
| Pezzoli (2007)[45]    | Italy  | In 5 years, 776 subjects were interviewed and 733 (94.4%) agreed to an endoscopic examination (M/F:375/401; mean age 55 years): 562 colonoscopies were performed. | Observational Study.                                                                                                                                              | 8% of patients had either AAs or cancer.                                                                                                                       |  |



|                          |                |                                                                                                                                   |                                                                                                                                                           |                                                                                                                                                                                                                                                                                |                                                                                                                               |
|--------------------------|----------------|-----------------------------------------------------------------------------------------------------------------------------------|-----------------------------------------------------------------------------------------------------------------------------------------------------------|--------------------------------------------------------------------------------------------------------------------------------------------------------------------------------------------------------------------------------------------------------------------------------|-------------------------------------------------------------------------------------------------------------------------------|
| Regula<br>(2006)[46]     | Poland         | 10443 people aged 40-66 years. Stratified Age 40-49 with any FH, or age 50-66 stratified by 1 FDR<60, 1 FDR >60 or 2 FDRs any age | A cross-sectional analysis of the data from a large colonoscopy-based screening program that included 50,148 participants who were 40 to 66 years of age. | FH is an independent predictor of CRC risk. 10.0 to 15.6% of the participants (depending on their age) had a FHCC                                                                                                                                                              |                                                                                                                               |
| Dove-Edwin<br>(2006)[35] | United Kingdom | 197 people from AC families                                                                                                       | Microsatellite instability tested in all families. 29 families were classified as LS and 68 as non-LS.                                                    | AAs occurred in 7 of 91 (7.7%) LS individuals and 15 of 197 (7.6%) FCC-X individuals, adjusted relative risk 1.15 (95% CI: 0.6–2.3). There were no cancers in the FCC-X group vs 4.4% CRC in Lynch patients, indicating lower risk of CRC in FCC-X despite equivalent AA risk. | A FH of microsatellite stable tumours was associated with significantly lower prevalence of advanced neoplasia in AC families |
| Dove-Edwin<br>(2005)[31] | United Kingdom | 1678 people with a FHCC. Stratified by one FDR <45 years, 2 FDRs, 3                                                               | A highly stringent surveillance programme with 1678 individuals                                                                                           | AAs and cancer were most common in families with hereditary non-polyposis CRC (on initial colonoscopy 5.7% and 0.9%, respectively). In the families with moderate                                                                                                              | Patient registration and adherence of surveillance                                                                            |

|                     |                |                                                                             |                                        |                                                                                                                                                                                                                                                                                                                                                                                               |                                                                                                               |
|---------------------|----------------|-----------------------------------------------------------------------------|----------------------------------------|-----------------------------------------------------------------------------------------------------------------------------------------------------------------------------------------------------------------------------------------------------------------------------------------------------------------------------------------------------------------------------------------------|---------------------------------------------------------------------------------------------------------------|
|                     |                | FDRs but none < 50 years, or AC                                             | from HNPCC and moderate risk families. | risk, these findings were particularly uncommon under age 45 (1.1% and 0%) and on follow-up colonoscopy if AAs were absent initially (1.7% and 0.1%). The incidence of CRC was substantially lower-80% in families with moderate risk (P = 0.00004), and 43% in families with HNPCC (P = 0.06)-than the expected incidence in the absence of surveillance when the FH was taken into account. | programmes mitigates CRC risk                                                                                 |
| Bradshaw (2003)[29] | United Kingdom | 176 people with a FHCC. Stratified by 'moderate risk' or Amsterdam criteria | Observational study.                   | Only 5 of 104 patients in the moderate risk group (1-2 FDRs) had adenomas, with only 1 AA. Of these 2 were under 50 years. Median age of individuals who underwent colonoscopy in both increased risk groups was 43 years.                                                                                                                                                                    | There was a low adenoma detection rate which may reflect the historical nature of this and other older study. |
| Clark (2003)[47]    | United Kingdom | 186 people with a FHCC. Stratified by one FDR <45 years or 2 FDRs any       | Observational study.                   | 10% of 238 individuals in a moderate risk group had either cancer or adenomas.                                                                                                                                                                                                                                                                                                                |                                                                                                               |

|                    |           |                                                                               |                      |                                                                                                                                                    |  |
|--------------------|-----------|-------------------------------------------------------------------------------|----------------------|----------------------------------------------------------------------------------------------------------------------------------------------------|--|
|                    |           | age using contemporary BSG guidelines                                         |                      |                                                                                                                                                    |  |
| Dowling (2000)[27] | Australia | 232 people with a FHCC. Stratified by one FDR <45 years or multiple relatives | Observational study. | In 232 patients, 4 AAs and 2 cancers (2.5%) were identified, with only 1 AA before age 50 years. The adenoma detection rate (ADR) was 14% overall. |  |

**GRADE Table 2. Adenoma detection with dye-based chromoendoscopy in LS surveillance**

| Study                          | Timeframe | Type                                          | n   | HD  | WT<br>WLE | WT<br>CLE | ADR<br>WLE | ADR<br>CLE | MAP<br>WLE | MAP<br>CLE |
|--------------------------------|-----------|-----------------------------------------------|-----|-----|-----------|-----------|------------|------------|------------|------------|
| Lecomte<br>2005[82]            | 2001-2003 | Tandem,<br>sequential                         | 33  | No  | n/a       | 17        | 15%        | n/a        | 0.69       | 1.25       |
| Huneburg<br>2009 [91]          | 2005-2007 | Tandem,<br>sequential                         | 47  | No  | 7.6       | 18.0      | 15%        | 28%*       | 0.53       | 0.98       |
| Stoffel 2008<br>[83]           | Pre-2008  | Tandem,<br>Randomised 2 <sup>nd</sup><br>exam | 52  | No  | 25.3      | 29.8      | n/a        | n/a        | 0.5        | 0.4        |
| Rahmi 2015<br>[85]             | 2008-2009 | Tandem,<br>sequential                         | 78  | No  | 10.0      | 21.5      | 23%        | 41%        | 0.3        | 0.7        |
| Haanstra<br>2019 [86]          | 2008-     | Parallel group<br>RCT                         | 246 | 50% | 12        | 18        | 27%        | 33%        |            |            |
| Rivero<br>Sanchez 2018<br>[87] | 2016-2017 | Parallel group<br>RCT                         | 256 | Yes | 13.5      | 18.4      | 28%        | 34%        | 1.0        | 0.86       |

WT, withdrawal time; ADR, adenoma detection rate; MAP, mean adenomas per patient; \*WLE and NBI series combined

**GRADE Table 3. Adenoma detection with virtual chromoendoscopy in LS surveillance**

| Study                  | Timeframe | Type                                      | n  | HD  | WT<br>WLE | WT<br>VCE | ADR<br>WLE | ADR<br>VCE | MAP<br>WLE | MAP<br>VCE |
|------------------------|-----------|-------------------------------------------|----|-----|-----------|-----------|------------|------------|------------|------------|
| East 2008<br>[84]      | 2006      | NBI, Tandem<br>right colon,<br>sequential | 62 | Yes | 6.3       | 7.0       | 27%        | 42%        | 0.40       | 0.74       |
| Bisschops<br>2017 [98] | 2010-2012 | I-SCAN, Tandem,<br>randomised             | 61 | Yes | 8.1       | 8.9       | 13%        | 23%        | 0.11*      | 0.37*      |

\*WLE or I-SCAN only, not in addition as in NBI study

GRADE table 4: What is the appropriate colonoscopy surveillance interval for patients for LS?

| Author, year       | Country                   | Study population                                                                                                                         | Design                                                                                                                                                                                  | Findings                                                                                                                                                                                                                                                                                                                                                            | Comments                                                                             |
|--------------------|---------------------------|------------------------------------------------------------------------------------------------------------------------------------------|-----------------------------------------------------------------------------------------------------------------------------------------------------------------------------------------|---------------------------------------------------------------------------------------------------------------------------------------------------------------------------------------------------------------------------------------------------------------------------------------------------------------------------------------------------------------------|--------------------------------------------------------------------------------------|
| Moller, 2018 [111] | Multicentre International | 3119 LS patients<br>Affected and unaffected by cancer<br>1473 MLH1 (13,846y)<br>1060 MSH2 (7492y)<br>462 MSH6 (2613y)<br>124 PMS2 (524y) | Prospective observational multicentre study, which estimated cancer incidence and survival in LS patients up to age 75 for 24,475 observation years<br><br>Stratifies risk by age, gene | Cumulative incidences at 75y for CRC were 46% (MLH1), 43% (MSH2), and 15% (MSH6).<br>CRC was not observed in PMS2 carriers.<br><br>Most CRC affected the colon rather than sigmoid/rectum<br><br>5-year and 10 year survival for colon cancer was 96% and 75% respectively<br><br>5-year and 10 year survival for recto-sigmoid cancer was 75% and 70% respectively | Low number of PMS2 observation years<br><br>Wide CIs of the observed point estimates |
| Moller, 2017 [112] | Multicentre International | 1942 LS patients without previous cancer                                                                                                 | Prospective observational multicentre study, which estimated cancer incidence                                                                                                           | 151 patients developed CRC                                                                                                                                                                                                                                                                                                                                          | Cumulative incidences for first cancers                                              |

Commented [KMI]: Check italics throughout table

|                    |                           |                                                                                                                             |                                                                                                                                                                                                                      |                                                                                                                                                                                                                                                                                                                                                         |                                                                                                                         |
|--------------------|---------------------------|-----------------------------------------------------------------------------------------------------------------------------|----------------------------------------------------------------------------------------------------------------------------------------------------------------------------------------------------------------------|---------------------------------------------------------------------------------------------------------------------------------------------------------------------------------------------------------------------------------------------------------------------------------------------------------------------------------------------------------|-------------------------------------------------------------------------------------------------------------------------|
|                    |                           | 944 <i>MLH1</i> , 616 <i>MSH2</i> , 305 <i>MSH6</i> , 77 <i>PMS2</i>                                                        | and survival in LS patients receiving colonoscopic surveillance for 13,782 observation years<br><br>Stratifies risk by age, gene, and gender                                                                         | CRC cumulative incidences (first cancer) at 70y by gene were 46% ( <i>MLH1</i> ), 35% ( <i>MSH2</i> ), 20% ( <i>MSH6</i> ) and 0% ( <i>PMS2</i> )<br><br>5 year and 10-year survival after 1 <sup>st</sup> CRC was 94% and 91% respectively<br><br>Median time since last colonoscopy in 145 CRC was 31.8 months, median 27 months (range 7-123 months) | Low number of <i>PMS2/MSH6</i> observation years                                                                        |
| Moller, 2017 [110] | Multicentre International | 1273 LS patients with previous cancer diagnoses<br><br>944 <i>MLH1</i> , 616 <i>MSH2</i> , 305 <i>MSH6</i> , 77 <i>PMS2</i> | Prospective observational multicentre study, which estimated incidence of subsequent cancers and survival in LS patients with prior cancer diagnosis for 7753 observation years<br><br>Stratifies risk by age, gene, | Cumulative incidences of subsequent CRC were 46% ( <i>MLH1</i> ), 48% ( <i>MSH2</i> ), and 23% ( <i>MSH6</i> )<br><br>Time since last colonoscopy to CRC was available for 133/141 patients in whom first cancer was CRC; 60 (46%) of CRCs were diagnosed within 2y and 102 (78%) within 3y                                                             | Did not have details of previous CRC treatment for previously affected patients<br><br>No detail about adenomas removed |

| Author, year      | Country              | Study population                                                                                                                                                                      | Design                                                                                                                                                                                                                                                                                                                                                     | Findings                                                                                                                                                                                                                                                                                                                                                                                                                                                                                                                                                                                                                            | Comments                                                                                                                                                                                                                                                                                        |
|-------------------|----------------------|---------------------------------------------------------------------------------------------------------------------------------------------------------------------------------------|------------------------------------------------------------------------------------------------------------------------------------------------------------------------------------------------------------------------------------------------------------------------------------------------------------------------------------------------------------|-------------------------------------------------------------------------------------------------------------------------------------------------------------------------------------------------------------------------------------------------------------------------------------------------------------------------------------------------------------------------------------------------------------------------------------------------------------------------------------------------------------------------------------------------------------------------------------------------------------------------------------|-------------------------------------------------------------------------------------------------------------------------------------------------------------------------------------------------------------------------------------------------------------------------------------------------|
| Engel, 2018 [114] | Germany, NL, Finland | 2747 LS patients from 3 LS registries; German HNPCC Consortium (n=1027), Dutch LS registry (n= 806), & Finnish LS Registry (n=914).<br><br>MMR carriers: 407 MLH1, 986 MSH2, 354 MSH6 | Prospective observational study, which collected data from 16,327 colonoscopic examinations (1984 -2015) of 2747 LS patients from three countries with different surveillance policies annually (Germany), 1-2 yearly (NL), and 2-3yearly (Finland)<br><br>23,309 person-yrs observation time<br><br><u>Cohort 1:</u> pts unaffected with CRC before start | 10-year CRC survival was 91%, and for MLH1 (91%), MSH2 (92%), and MSH6 (100%)<br><br>At index colonoscopy; 10.2% prevalent adenomas and 2.3% prevalent CRC<br><br>ADR was 15.6% in cohort 1 and 14.1% in cohort 2; no significant difference in ADR between the 3 countries (p=0.996 for cohort 1 and p=0.411 for cohort 2)<br><br>No significant differences in UICC stages of incident CRC were observed between countries (p=0.150) or by time interval since last colonoscopy (p=0.240)<br><br>After 10 years follow-up, cumulative CRC incidence was 8.4% for first CRC and 14.1% for metachronous ; no significant difference | Low number of PMS2 mutation carriers<br><br>KPI data for colonoscopies not available<br><br>Incident cancers defined as screened detected and symptomatic cancers (therefore includes interval cancers)<br><br>National protocol interval length could have been modified based on risk factors |



|                        |                            |                                                                                                                                          |                                                                                                                                                                                     |                                                                                                                                                                                                                                                          |                                                                                                                                                         |
|------------------------|----------------------------|------------------------------------------------------------------------------------------------------------------------------------------|-------------------------------------------------------------------------------------------------------------------------------------------------------------------------------------|----------------------------------------------------------------------------------------------------------------------------------------------------------------------------------------------------------------------------------------------------------|---------------------------------------------------------------------------------------------------------------------------------------------------------|
|                        |                            |                                                                                                                                          | <u>Cohort 2</u> : pts already treated for CRC                                                                                                                                       | in cumulative CRC incidence seen between countries in cohort 1 ( $p=0.246$ ) and 2 ( $p=0.432$ )<br><br>21% of Germany patients longer intervals (>1.5y) and 13% of Dutch (>2.5%), and 9% of Finnish patients had shorter intervals (<1.5yrs)            | Did not include PMS2/EPCAM<br><br>2 MLH1 founder mutations (79% of Finnish group were MLH1 mutation carriers)                                           |
| ten Broeke, 2018 [115] | International multi-centre | 284 PMS2 families (211 European, 19 Ohio, and 54 from CCFR), with 1,904 first- and 2,974 second degree relatives; 513 confirmed carriers | Retrospective cancer risk study, which used modified segregation analysis for estimation of HR and age-specific cumulative risks (penetrance)<br>Includes population-based patients | Cumulative CRC risk (up to 80y) was ~13% (95% CI, 7.9-22%) for male carriers and 12% (95% CI, 6.7-21%) for females (general population 6.6% and 4.7% respectively)<br><br>Mean age at CRC diagnosis was 59.4 (14.7 SD) for FDR and 62.7 (3.0 SD) for SDR | Largest PMS2 dataset<br><br>Unconfirmed cancer diagnoses used in analysis – retrospective analysis<br><br>Potential genetic and environmental modifiers |

| Author, year       | Country | Study population                                                           | Design                                                                                                                                                        | Findings                                                                                                                                                                                                                                                                                                                                                                                 | Comments |
|--------------------|---------|----------------------------------------------------------------------------|---------------------------------------------------------------------------------------------------------------------------------------------------------------|------------------------------------------------------------------------------------------------------------------------------------------------------------------------------------------------------------------------------------------------------------------------------------------------------------------------------------------------------------------------------------------|----------|
| Newton, 2015 [106] | UK      | 227 LS mutation carriers or obligates (85 MLH1, 119 MSH2, 21 MSH6, 2 PSM2) | Retrospective longitudinal study investigating screening compliance in LS mutation carriers on a regional familial CRC registry under and not under screening | <p>439 colonoscopies assessed for timeliness, of which 68% compliant (interval &lt;27 months)</p> <p>313/339 colonoscopies were complete (92.3%), 26/339 (7.7%) did not reach the caecum</p> <p>Bowel prep poor in 36/340 (9.6%)</p> <p>Cumulative incidence of CRC (up to 70y) was 25% (95% CI 17-32%) in surveillance grp vs 81% (95% CI 78-84%) in grp not screened (p&lt;0.0001)</p> |          |

|                     |    |                                             |                                                                                                                                                                                                                                          |                                                                                                                                                                                                                                                                                                                                                                                                                                                                                                                                                                                          |  |
|---------------------|----|---------------------------------------------|------------------------------------------------------------------------------------------------------------------------------------------------------------------------------------------------------------------------------------------|------------------------------------------------------------------------------------------------------------------------------------------------------------------------------------------------------------------------------------------------------------------------------------------------------------------------------------------------------------------------------------------------------------------------------------------------------------------------------------------------------------------------------------------------------------------------------------------|--|
| Haanstra, 2013 [68] | NL | 2,384 proven and obligate mutation carriers | Retrospective analysis of data from the Dutch LS Registry and 2 large hospitals in NL examining the characteristics of patients with interval cancers and the features of such cancers (MLH1 32%, MSH2 41%, MSH6 23%, PMS2 2%, EPCAM 2%) | <p>31 interval cancers in 29 patients (median age 52 (range 35-73), all MLH1 and MSH2 carriers)</p> <p>Median interval since last surveillance colonoscopy was 17 (range 2-24) months. Most diagnosed between 1 and 2y after previous examination</p> <p>In 5 patients (16%) complete colon examination was not achieved during previous colonoscopy; in 3/5 of these patients (60%), CRC was found in the part of colon not reached previously</p> <p>In patients without previous surgery for CRC, 84% was proximally located; 77% of interval cancers were local stage (T1-3N0Mx)</p> |  |
|---------------------|----|---------------------------------------------|------------------------------------------------------------------------------------------------------------------------------------------------------------------------------------------------------------------------------------------|------------------------------------------------------------------------------------------------------------------------------------------------------------------------------------------------------------------------------------------------------------------------------------------------------------------------------------------------------------------------------------------------------------------------------------------------------------------------------------------------------------------------------------------------------------------------------------------|--|

| Author, year                     | Country | Study population                                                      | Design                                                                                                                                   | Findings                                                                                                                                                                                                                                                                                                                                                                                                                   | Comments |
|----------------------------------|---------|-----------------------------------------------------------------------|------------------------------------------------------------------------------------------------------------------------------------------|----------------------------------------------------------------------------------------------------------------------------------------------------------------------------------------------------------------------------------------------------------------------------------------------------------------------------------------------------------------------------------------------------------------------------|----------|
| de Vos tot Nederveen, 2002 [107] | NL      | 857 at-risk individuals from 114 families with HNPCC or MMR mutations | Observational study comparing the stage of screen-detected CRC with more frequent (2 years and less) and less frequent colonoscopy (>2y) | <p>In 16/31 colonoscopy reports, the quality of bowel preparation was not reported.</p> <p>Interval <math>\leq 2y</math> or <math>&lt; 2y</math>: Dukes' A (n = 4), B (n = 11), and C (n=1)</p> <p>Interval <math>&gt; 2y</math>: Dukes' A (n = 3), B (n = 10), and C (n = 6)</p> <p>Earlier tumour stage observed in those with more frequent colonoscopy (2y or less) vs less frequent colonoscopy – 93.8% vs. 68.4%</p> |          |

|                        |    |                                                                                                      |                                                                                                                                           |                                                                                                                                                                                                                                                                                                           |  |
|------------------------|----|------------------------------------------------------------------------------------------------------|-------------------------------------------------------------------------------------------------------------------------------------------|-----------------------------------------------------------------------------------------------------------------------------------------------------------------------------------------------------------------------------------------------------------------------------------------------------------|--|
| Vasen,<br>2010 [113]   | NL | 745 at-risk individuals from 205 LS pedigrees (with MLH1, MSH2, MSH6)                                | Retrospective cohort study investigating the rate of interval cancers with screening.<br><br>Colonoscopy 1-2y<br><br>Mean follow-up: 7.2y | Thirty-three interval cancers; (83% local stage); ranging from 34 to 71y, 4 cases <40; higher in carriers older than 40y<br><br>Higher risk of interval cancer in MLH1 and MSH2 mutation carriers, compared to MSH6 carriers (1/127)<br><br>6% risk of interval cancer over 10y                           |  |
| Rijcken,<br>2002 [118] | NL | 100 HNPCC adenomas (from 46 AC+/LS mutation carriers) and 152 sporadic adenomas (from control group) | Retrospective analysis comparing the characteristics of 100 HNPCC adenomas with 152 sporadic adenomas                                     | HNPCC adenomas more likely to be proximally located (50% vs. 26%; p=0.018), and smaller than sporadic adenomas<br><br>All proximal HNPCC $\geq$ 5mm were highly dysplastic vs. 17% of the larger sporadic polyps (p<0.001) – and often more highly dysplastic than larger distal HNPCC adenomas (p<0.001) |  |

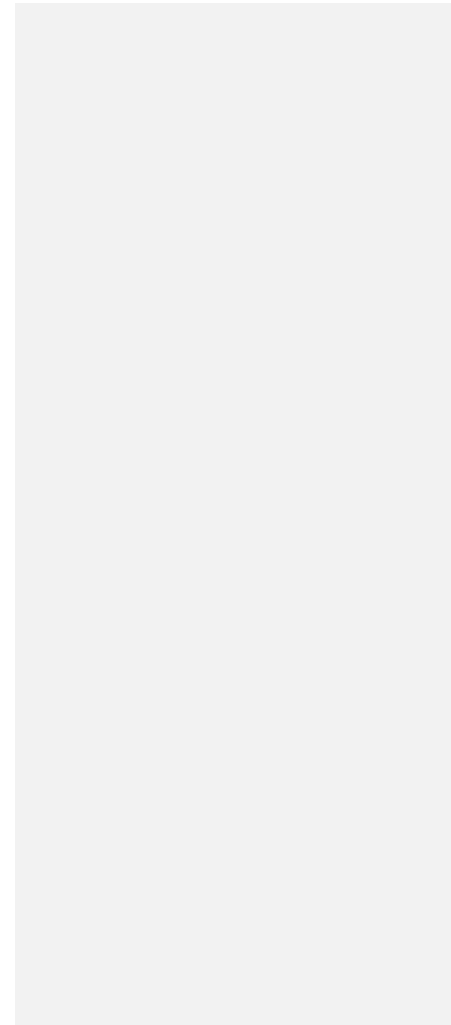

GRADE Table 5: Studies: Constitutive mutations in early onset colorectal cancer (EOCRC)

| Study               | Population      | Type/Limitations                                                               | Age of CRC | Testing                                                                                        | Results Tumour testing                                                               | Results germline testing                                                                                                                                                                                                                                   |
|---------------------|-----------------|--------------------------------------------------------------------------------|------------|------------------------------------------------------------------------------------------------|--------------------------------------------------------------------------------------|------------------------------------------------------------------------------------------------------------------------------------------------------------------------------------------------------------------------------------------------------------|
| Pearlman 2017 [166] | 450 EOCRC cases | Prospective study<br><br>Good study<br>No age stratification into decades      | <50 years  | IHC/MSI on tumour block n=450<br><br>25 cancer susceptibility gene panel on germline DNA n=450 | 48 (10.7%) dMMR tumour<br><br>3 <i>MLH1</i> hypermethylation<br><br>402 (89.3%) pMMR | 37 LS, 2 MAP, 7 somatic MMR mutations, 1 constitutional hypermethylation<br><br>9 (2%) high penetrance CRC genes<br><br>13 (3%) other high/mod penetrance cancer predisposing gene<br><br>10 (2.5%) low penetrance CRC genes<br><br>145 patients (32%) VUS |
| Mork 2015 [167]     | 193 EOCRC       | Retrospective study<br><br>Good study but germline testing variable.<br>No age | <35 years  | IHC/MSI tumour n=173<br><br>Phenotype directed germline testing n=21                           | 45 (26%) dMMR tumour                                                                 | 23 (51%) MMR mutation<br><br>21 (100%) pathogenic mutation in <i>APC</i> , <i>MUTYH</i> (biallelic), MMR genes (biallelic), TP53                                                                                                                           |

|                    |           |                                                                                                                       |           |                                                         |                                                                                         |                                                                                                                                                                               |
|--------------------|-----------|-----------------------------------------------------------------------------------------------------------------------|-----------|---------------------------------------------------------|-----------------------------------------------------------------------------------------|-------------------------------------------------------------------------------------------------------------------------------------------------------------------------------|
|                    |           | stratification                                                                                                        |           |                                                         |                                                                                         |                                                                                                                                                                               |
| Stoffel 2018 [168] | 315 EOCRC | Retrospective study<br><br>Some missing data. Numbers in paper do not add up, so difficult to assess what was tested. | <50 years | IHC/MSI tumour n=146<br><br>Germline testing n= 430 (?) | 38 (12%) dMMR tumour<br><br>126 (40%) pMMR tumour<br><br>151 (48%) MMR status tumour UK | 17 (41%) MMR gene mutation<br><br>5(4%) high penetrance CRC gene mutation<br><br>14 (9%) high penetrance CRC gene mutation<br><br>79 (18%) high penetrance CRC gene mutations |



GRADE Table 6: Studies of patients with Multiple colorectal adenomas

| Study              | Population                                                           | Total Number | 10-19 Adenomas | 20-99 Adenomas | Gene Panel                                                                                                          | Yield/Comments                                                                               |
|--------------------|----------------------------------------------------------------------|--------------|----------------|----------------|---------------------------------------------------------------------------------------------------------------------|----------------------------------------------------------------------------------------------|
| Stanich 2019 [166] | US patients with >10 polyps                                          | 3789         | 1342           | 1657           | <i>APC, BMPR1A, CDH1, CHEK2, EPCAM, MLH1, MSH2, MSH6, MUTYH, PMS2, PTEN, SMAD4, STK11, TP53, GREM1, POLD1, POLE</i> | 7.6% of those with 10-19 adenomas and 13.7% in those with 20-99 adenomas                     |
| Grover 2012 [188]  | MCRA                                                                 | 7225         | 970            | 3253           | <i>APC, MUTYH</i>                                                                                                   | 9% 10-9 adenomas and 17% 20-99 adenomas                                                      |
| Nielsen 2007 [193] | 10-99 adenomas in                                                    | 146          | na             | na             | <i>APC, MUTYH</i>                                                                                                   | 12.30%                                                                                       |
| Li 2017 [194]      | Chinese MCRA                                                         | 96           | na             | na             | <i>APC, MUTYH</i>                                                                                                   | 57% had a pathogenic mutation identified versus only 2% in those without this personal or FH |
| Cheng 2015 [190]   | Cases of 5-100 adenomas without <i>APC</i> or <i>MUTYH</i> mutations | 178          | na             | na             | Low penetrance SNPs rs6983267, rs10795668, rs3802842                                                                | 3% of cases of 5-100 adenomas without <i>APC</i> or <i>MUTYH</i> mutations                   |

|                     |                                                                                                                  |     |    |    |                                               |        |
|---------------------|------------------------------------------------------------------------------------------------------------------|-----|----|----|-----------------------------------------------|--------|
| Ngeow<br>2014 [195] | 5-29 polyps, at<br>least one a<br>hamartoma or<br>serrated<br>lesion                                             | 421 | na | na | <i>ENG, PTEN, STK11, BMPR1A and<br/>SMAD4</i> | 10.80% |
| Spier 2016<br>[192] | At least 20<br>synchronous<br>or 40<br>metachronous<br>adenomas no<br><i>MUTYH</i> or<br><i>APC</i><br>mutations | 20  | na | na | <i>APC</i> mosaicism                          | 25%    |
| Spier 2015<br>[189] | At least 20<br>synchronous<br>or 40<br>metachronous<br>adenomas no<br><i>MUTYH</i> or<br><i>APC</i><br>mutations | 144 | na | na | DNA polymerase<br>pathogenic variants<br>gene | 1.30%  |



Supplement: gutjnl-2019-319915supp002.pdf [file gutjnl-2019-319915supp002.pdf]
